# Supplementary material for: HSD17B7 counters bone loss in estrogen deficiency via estrogen receptor stabilization and mediates the effect of raloxifene
Source: Research Square preprint supplement (doi:10.21203/rs.3.rs-6158228/v1), 2025-03-26
Supplement: Supplementary file 1 [file e6baa154a7e4e1a533f7c9a1.docx]

**HSD17B7 counters bone loss in estrogen deficiency via estrogen receptor stabilization and mediates the effect of raloxifene**

**Supplemental information**

**1. Supplemental table**

**2. Supplemental figures**

**1. Supplemental table**

**Table S1.** The primer sequences used in the PCR

| **qRT-PCR** | | |
| --- | --- | --- |
| Genes | Forward (5′ to 3′) | Reverse (3′ to 5′) |
| *Hsd17b7* | CTGTGACACCGTACAACGGA | GCTCGGGTGATCCGATTTCT |
| *Nrf1* | AGCACGGAGTGACCCAAAC | TGTACGTGGCTACATGGACCT |
| *Sdhb* | AATTTGCCATTTACCGATGGGA | AGCATCCAACACCATAGGTCC |
| *Tfam* | GGAATGTGGAGCGTGCTAAAA | ACAAGACTGATAGACGAGGGG |
| *Mcad* | AGGGTTTAGTTTTGAGTTGACGG | CCCCGCTTTTGTCATATTCCG |
| *Cycs* | CCAAATCTCCACGGTCTGTTC | ATCAGGGTATCCTCTCCCCAG |
| *Ndufs1* | TGCAAATCCCTCGATTCTGTTAC | GCTTTCTCAATCTCTACCAGGC |
| *Ndufv2* | GCAAGGAATTTGCATAAGACAGC | TAGCCATCCATTCTGCCTTTG |
| *Trap* | CAGCAGCTCCCTAGAAGATGG | CTGGAACCTCTTGTCGCTGG |
| *CathpsinK* | GAAGAAGACTCACCAGAAGCAG | TCCAGGTTATGGGCAGAGATT |
| *Nfatc1* | GACCCGGAGTTCGACTTCG | TGACACTAGGGGACACATAACTG |
| *Col1a* | GTGCTAAAGGTGCCAATGGT | ACCAGGTTCACCGCTGTTAC |
| *Spp1* | ATCTCACCATTCGGATGAGTCT | TGTAGGGACGATTGGAGTGAAA |
| *Osx* | TTACAAGCACTAATGGGCTCCT | GTAGACACTGGGCAGACAGTCA |
| *Bglap* | CTGACCTCACAGATCCCAAGC | TGGTCTGATAGCTCGTCACAAG |
| *Runx2* | TTACTTACACCCCGCCAGTC | CACTCTGGCTTTGGGAAGAG |
| *Tnfsf11* | CAGCATCGCTCTGTTCCTGTA | CTGCGTTTTCATGGAGTCTCA |
| *Tnfrsf11b* | ACCCAGAAACTGGTCATCAGC | CTGCAATACACACACTCATCACT |
| *Mtco1* | CTACTATTCGGAGCCTGAGC | GCATGGGCAGTTACGATAAC |
| *Mtco2* | AACCATAGGGCACCAATGATAC | GGATGGCATCAGTTTTAAGTCC |
| *Cox5b* | TTCAAGGTTACTTCGCGGAGT | CGGGACTAGATTAGGGTCTTCC |
| *Ppia* | GAGCTGTTTGCAGACAAAGTTC | CCCTGGCACATGAATCCTGG |
| *Rps3* | CAGGCAGAGTCTCTACGCTACA | TCTCCATAATGAACCGAAGCA |
| *Gapdh* | CAACTCCCTCAAGATTGTCAGCAA | GGCATGGACTGTGGTCATGA |

**2. Supplemental figures**

**
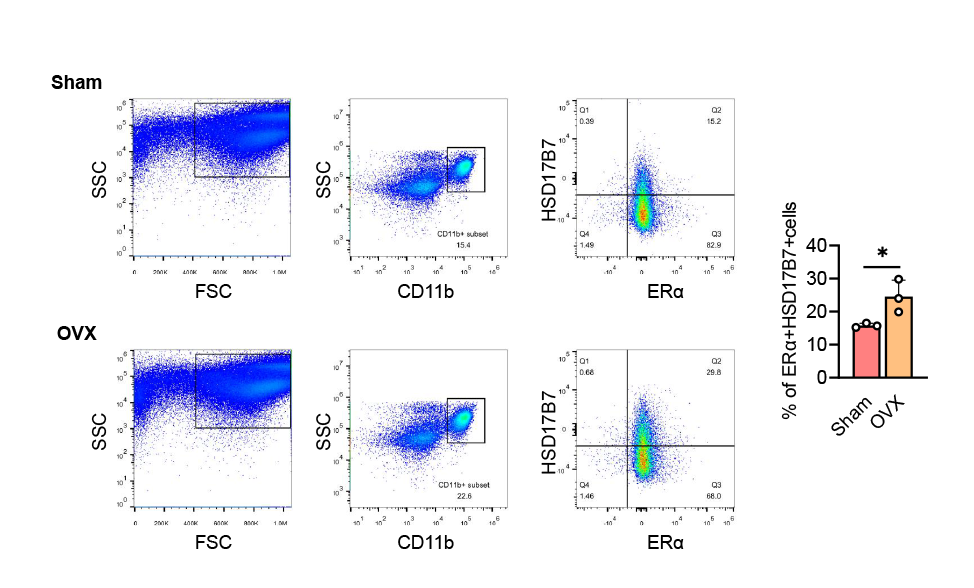
**

**Figure S1** FACS analysis of HSD17B7 and ERα in CD11b+ bone marrow cells from Sham/OVX and Young/Old mice.

**
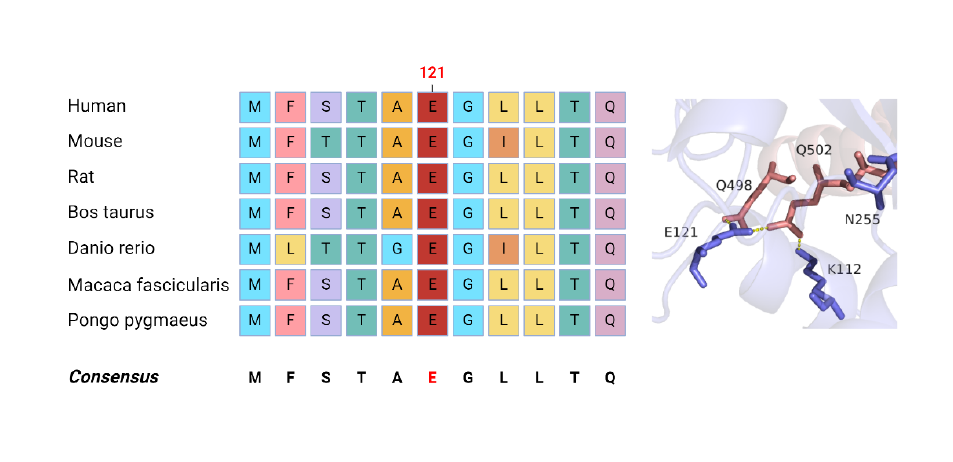
**

**Figure S2 A** After comparing the amino acid sequences of HSD17B7 across seven known species, glutamate(E) 121 was highly conserved. A docking module analysis of human ERα and HSD17B7 revealed potential docking sites.


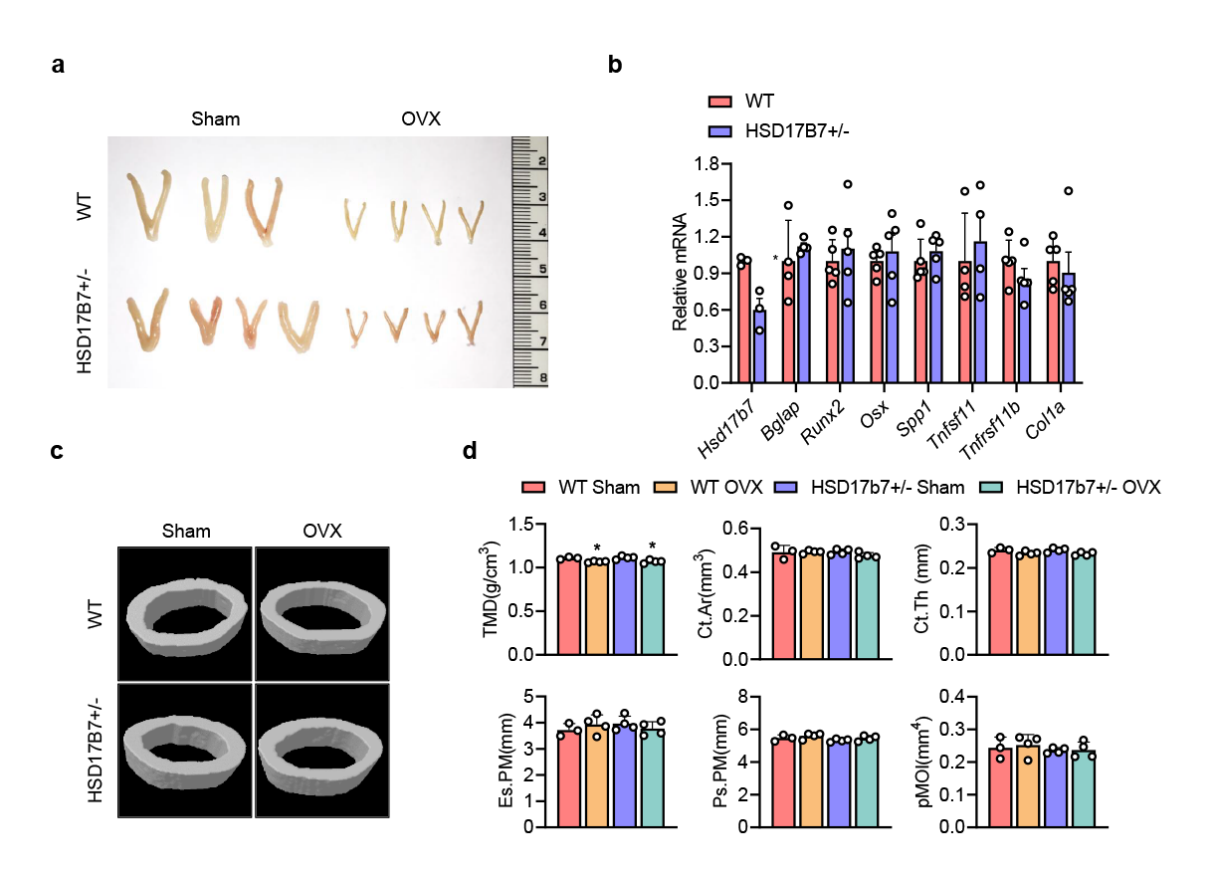


**Figure S3 Lacking HSD17B7 does not affect osteoblast function or cortical bone phenotype.** **A** Genotype identification of HSD17B7 heterozygote (HSD17B7+/-) mice. **B** Representative Western blot analysis results for osteoblast-related proteins (n=3–5). **C** qPCR for osteoblast marker genes in primary osteoblasts cells (n = 3–4). **D** Representative micro-CT reconstruction of cortical bone and micro-CT analysis. **E** Six weeks after surgery, uterus weight was determined (n = 3–4). TMD: tissue mineral density; Ct.Ar: cortical area; Ct.Th: cortical thickness; Ec.Pm: endosteal perimeter; Ps.Pm: periosteal perimeter; pMOI: Polar moment of inertia.*p < 0.05 versus WT or WT Sham.


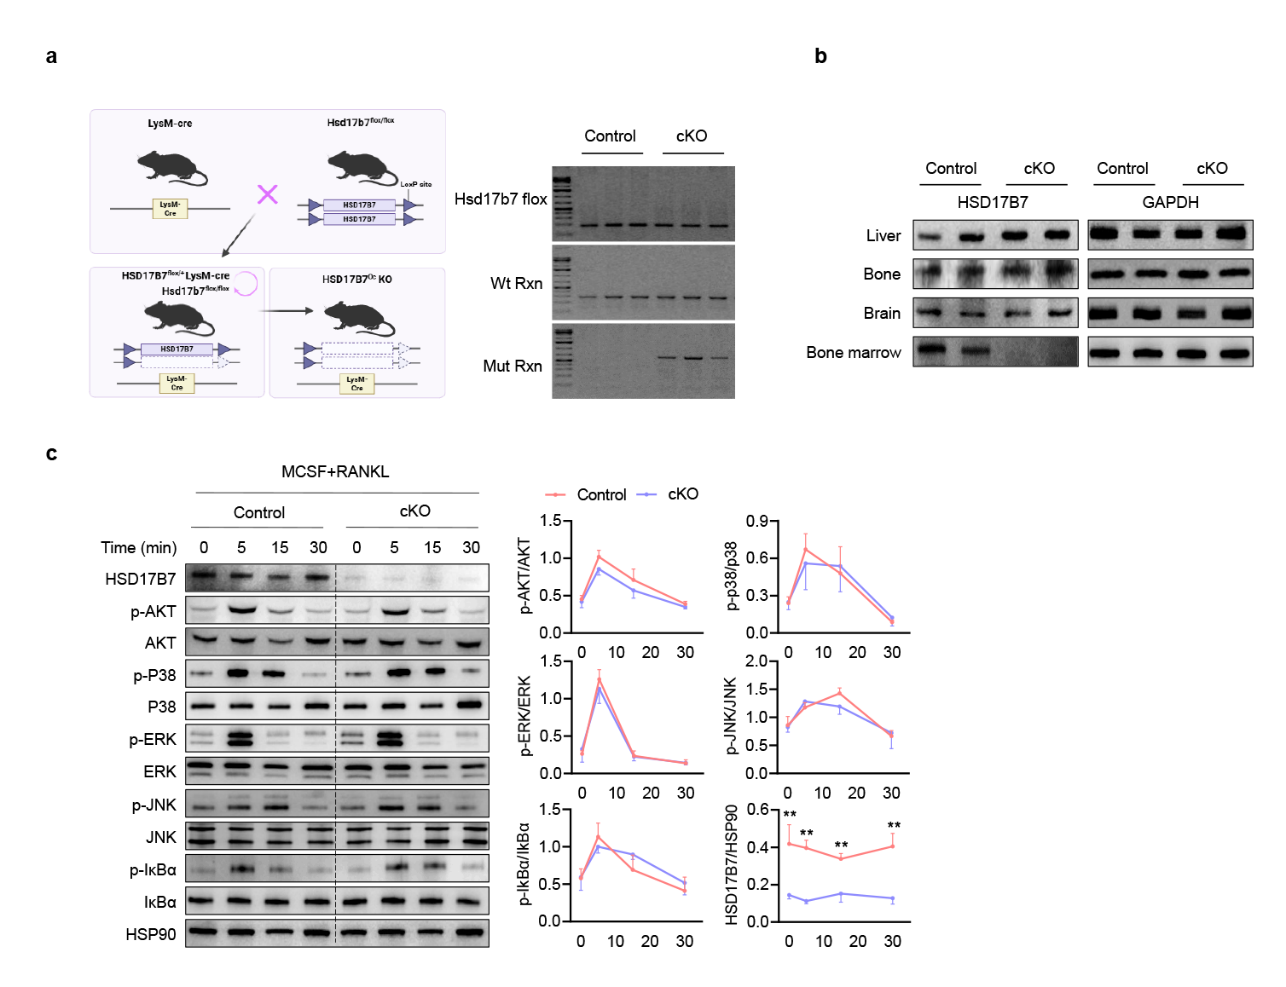


**Figure S4 Generation of monocyte-specific HSD17B7 knockout mice and RANKL-activated signaling pathway changes. A** Mating schematic diagram for HSD17B7 knockout (cKO) mice. PCR was used to identify the genotypes of the *Hsd17b7fl/fl* and *Lyz2-Cre* mice. **B** Western blots of multi-organ protein expression from WT and cKO mice. **C** HSD17B7 has no effect on the regulation of RANKL-activated signaling pathways. CD11b+ WT/cKO BMCs were treated with M-CSF (10 ng/ml) and sRANKL (30 ng/ml) for the indicated periods. Cell lysates were prepared. Changes in MAPKs, Akt, and NF-κB were evaluated by Western blotting, and the results were quantified (n = 3). Values presented are the mean ± SEM. **p < 0.01 versus WT.


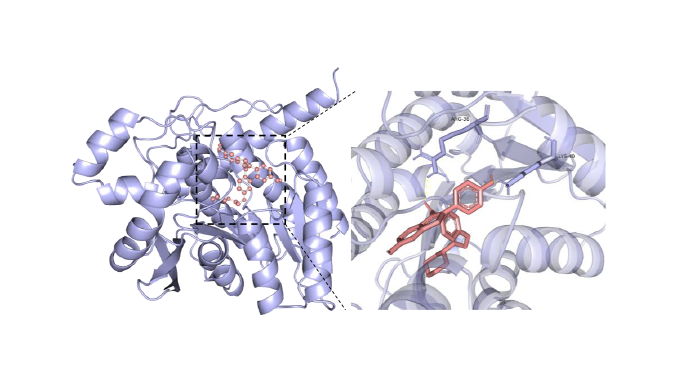


**Figure S5.** The docking module of HSD17B7 and raloxifene was predicted by AutoDock and exhibited with PyMol. (We suspected that HSD17B7 could also combine with raloxifene. To explore that hypothesis, we used AutoDock Vina to simulate molecular docking between HSD17B7 and raloxifene, and the binding energy was -8.5 kcal/mol, indicating a strong potential for real binding.)
